# Supplementary material for: Exploring the computational design of anionic spin-crossover systems
Source: Royal Society of Chemistry journal article supplement (doi:10.1039/d2qi02163c), 2022-11-04
Supplement: d2qi02163c1.pdf [file d2qi02163c1.pdf]

## Supporting Information

### Exploring the Computational Design of Anionic Spin-Crossover Systems

*Laia Navarro<sup>[1]</sup> and Jordi Cirera<sup>[1]\*</sup>*

[1] Departament de Química Inorgànica i Orgànica and Institut de Recerca de Química Teòrica i Computacional, Universitat de Barcelona, Diagonal 645, 08028 Barcelona, Spain

e-mail: jordi.cirera@qi.ub.es

|                                                                                                                                                                                                               |    |
|---------------------------------------------------------------------------------------------------------------------------------------------------------------------------------------------------------------|----|
| DFT Benchmark for the $[\text{Fe}(\text{OEt-L}_1\text{-pH})(\text{NCS})_3]^-$ system                                                                                                                          | S1 |
| Experimental values for different $[\text{Fe}(\text{R}_1\text{-L}_1\text{-pR}_2)(\text{L}_2)_3]^-$ reported systems                                                                                           | S2 |
| Schematic d-based Molecular Orbital Diagrams for the $[\text{Fe}(\text{OEt-L}_1\text{-pH})(\text{L}_2)_3]^-$ systems ( $\text{L}_2 = \text{NCO}^-$ , $\text{NCS}^-$ , $\text{NCSe}^-$ and $\text{NCBH}_3^-$ ) | S3 |
| Computed $T_{1/2}$ vs. the $\sigma_p$ Hammett parameters for the $[\text{Fe}(\text{OEt-L}_1\text{-pR}_2)(\text{L}_2)_3]^-$ systems                                                                            | S4 |
| Computed $\Delta E$ and $T_{1/2}$ for the $[\text{Fe}(\text{OEt-L}_1\text{-pR}_2)(\text{NCO})_3]^-$ systems                                                                                                   | S5 |
| Cartesian coordinates and output calculations additional data                                                                                                                                                 | S6 |
| Counterion effect control calculations                                                                                                                                                                        | S7 |

S1. DFT Benchmark for the  $[\text{Fe}(\text{OEt-L}_1\text{-pH})(\text{NCS})_3]^-$  system

| <i>Method</i> | $\Delta E$ | $\Delta H$ | $\Delta S$ | $T_{1/2}$ |
|---------------|------------|------------|------------|-----------|
| TPSSh         | 6.94       | 5.59       | 24.67      | 226       |
| OPBE          | 2.39       | 0.79       | 22.29      | 35        |
| OLYP          | -9.39      | -10.89     | 21.44      | -508      |
| B3LYP         | -7.83      | -9.14      | 23.78      | -384      |
| B3LYP*        | -5.54      | -6.86      | 21.65      | -317      |
| M06L          | -4.84      | -6.30      | 19.77      | -319      |

Table 1: Computed  $\Delta E$ ,  $\Delta H$ ,  $\Delta S$  and  $T_{1/2}$  for the  $[\text{Fe}(\text{OEt-L}_1\text{-pH})(\text{NCS})_3]^-$  systems.

Electronic Energies and Enthalpies in  $\text{kcal}\cdot\text{mol}^{-1}$ . Entropies in  $\text{cal}\cdot\text{K}^{-1}\cdot\text{mol}^{-1}$  and all temperatures in K. Experimental value for  $T_{1/2} = 132$  K

S2. Experimental values for different  $[\text{Fe}(\text{R}_1\text{-L}_1\text{-pR}_2)(\text{L}_2)_3]^-$  reported systems.

| <i>System</i>                                                   | <i>Counterion</i>                          | <i>T</i> <sub>1/2</sub>                   | <i>Refcode</i>        | <i>reference</i> |
|-----------------------------------------------------------------|--------------------------------------------|-------------------------------------------|-----------------------|------------------|
| $[\text{Fe}(\text{OEt-L}_1\text{-pH})(\text{NCS})_3]^-$         | $[\text{NEt}_4]^+$                         | 135                                       | IROMOU                | 1                |
| $[\text{Fe}(\text{OEt-L}_1\text{-pH})(\text{NCS})_3]^-$         | $[\text{Fe}(\text{py}_3\text{C-OEt})_2]^+$ | 205                                       | ZANLEJ                | 2                |
| $[\text{Fe}(\text{OEt-L}_1\text{-pH})(\text{NCBH}_3)_3]^-$      | $[\text{Fe}(\text{py}_3\text{C-OEt})_2]^+$ | 245(1), 380(2)                            | ZANLOT <sup>[a]</sup> | 2                |
| $[\text{Fe}(\text{OH-L}_1\text{-pH})(\text{NCS})_3]^-$          | $[\text{NEt}_4]^+$                         | 224(T <sup>↑</sup> ) 246(T <sup>↓</sup> ) | XOPDAJ                | 3                |
| $[\text{Fe}(\text{CH}_3\text{-L}_1\text{-pH})(\text{NCS})_3]^-$ | $[\text{NBu}_4]^+$                         | 330                                       | IHEKEN                | 4                |
| $[\text{Fe}(\text{CH}_3\text{-L}_1\text{-pH})(\text{NCS})_3]^-$ | $[\text{PPh}_4]^+$                         | 290                                       | UXOHEW                | 5                |
| $[\text{Fe}(\text{CH}_3\text{-L}_1\text{-pH})(\text{NCS})_3]^-$ | $[\text{NMe}_4]^+$                         | 313.4                                     | -                     | 6                |
| $[\text{Fe}(\text{Et-L}_1\text{-pH})(\text{NCS})_3]^-$          | $[\text{NMe}_4]^+$                         | 338.2                                     | -                     | 6                |
| $[\text{Fe}(\text{nPr-L}_1\text{-pH})(\text{NCS})_3]^-$         | $[\text{NMe}_4]^+$                         | 298.4                                     | VULHES                | 6                |
| $[\text{Fe}(\text{nBu-L}_1\text{-pH})(\text{NCS})_3]^-$         | $[\text{NMe}_4]^+$                         | 315.4                                     | KUYFES                | 6                |
| $[\text{Fe}(\text{Py-L}_1\text{-pH})(\text{NCS})_3]^-$          | $[\text{Fe}(\text{py}_4\text{C})_2]^+$     | 161                                       | GECHED                | 7                |
| $[\text{Fe}(\text{nR-L}_1\text{-pH})(\text{NCS})_3]^-$          | $[\text{NMe}_4]^+$                         | 185.6                                     | RIDGUJ                | 8                |

[a] = two-step transition

py<sub>3</sub>C-OEt = tris(2-pyridyl)ethoxymethane

py<sub>4</sub>C = tetrakis(2-pyridyl)methane

nR = nonadecane

References:

- 1 E. Cuza, C. D. Mekuimemba, N. Cosquer, F. Conan, S. Pillet, G. Chastanet and S. Triki, *Inorg. Chem.*, 2021, **60**, 6536–6549.
- 2 E. Cuza, S. Benmansour, N. Cosquer, F. Conan, S. Pillet, C. J. Gómez-García and S. Triki, *Magnetochemistry*, 2020, **6**, 26.
- 3 M. Yamasaki and T. Ishida, *Polyhedron*, 2015, **85**, 795–799.
- 4 M. Yamasaki and T. Ishida, *J. Mater. Chem. C*, 2015, **3**, 7784–7787.
- 5 T. Ishida, T. Kanetomo and M. Yamasaki, *Acta Crystallogr. Sect. C Struct. Chem.*, 2016, **72**, 797–801.
- 6 A. Kashiro, W. Kohno and T. Ishida, *Inorg. Chem.*, 2020, **59**, 10163–10171.
- 7 N. Hirose, Y. Oso and T. Ishida, *Chem. Lett.*, 2012, **41**, 716–718.
- 8 A. Kashiro, K. Some, Y. Kobayashi and T. Ishida, *Inorg. Chem.*, 2019, **58**, 7672–7676.

S3. Schematic d-based Molecular Orbital Diagrams for the  $[\text{Fe}(\text{OEt-L}_1\text{-pH})(\text{L}_2)_3]^-$  systems ( $\text{L}_2 = \text{NCO}^-$ ,  $\text{NCS}^-$ ,  $\text{NCSe}^-$  and  $\text{NCBH}_3^-$ ). Bottom table, energies (in  $\text{cm}^{-1}$ ) of the five d-based MOs upon the AILFT interpretation of the NEVPT2 calculation on the S=0 optimized geometry.

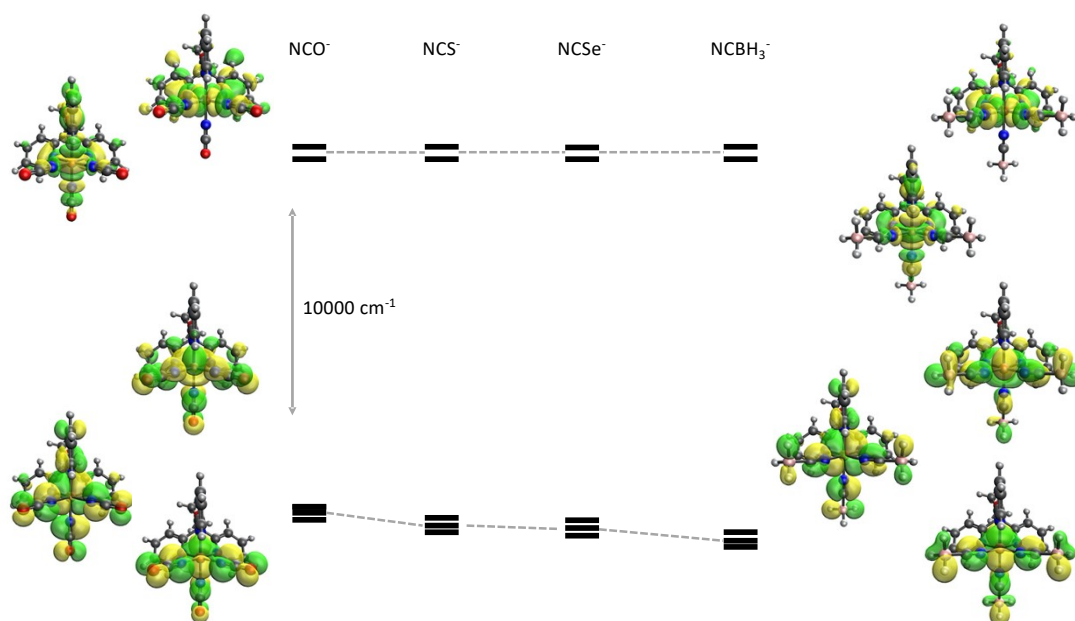

| $\text{NCO}^-$ | $\text{NCS}^-$ | $\text{NCSe}^-$ | $\text{NCBH}_3^-$ |
|----------------|----------------|-----------------|-------------------|
| 0              | 0              | 0               | 0                 |
| 259.1          | 307.9          | 315.6           | 307               |
| 544.8          | 599.9          | 610.3           | 618               |
| 17199.5        | 17717.7        | 17827.2         | 18255.8           |
| 17858.2        | 18390.2        | 18513.9         | 18950.1           |

S4. Computed  $T_{1/2}$  vs. the  $\sigma_p$  Hammett parameter for the  $[\text{Fe}(\text{OEt-L}_1\text{-pR}_2)(\text{L}_2)_3]^-$  systems.

$\text{L}_2$  are in green ( $\text{NCO}^-$ ), black ( $\text{NCS}^-$ ), blue ( $\text{NCSe}^-$ ) and red ( $\text{NCBH}_3^-$ ), and

$\text{R}_2 = -\text{NH}_2, -\text{OH}, -\text{OMe}, -\text{Me}, -\text{F}, -\text{H}, -\text{Cl}, -\text{Br}, -\text{CF}_3$  and  $-\text{NO}_2$ .

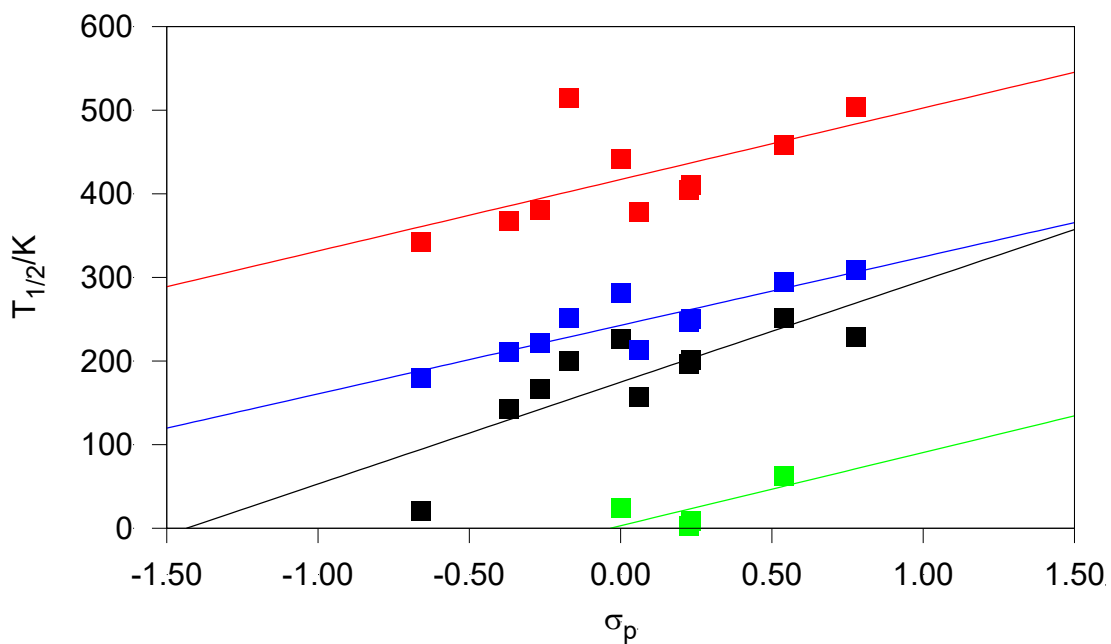

The corresponding  $R^2$  values are 0.75, 0.64, 0.76 and 0.40 respectively for  $\text{NCO}^-$ ,  $\text{NCS}^-$ ,  $\text{NCSe}^-$  and  $\text{NCBH}_3^-$ .

S5. Computed  $\Delta E$  and  $T_{1/2}$  for the  $[\text{Fe}(\text{OEt-L}_1\text{-pR}_2)(\text{NCO})_3]^-$  systems. All energies in  $\text{kcal}\cdot\text{mol}^{-1}$  and all temperatures in K.

| $[\text{Fe}(\text{OEt-L}_1\text{-pR}_2)(\text{NCX})_3]^-$ | $\text{NCO}^-$ |           |
|-----------------------------------------------------------|----------------|-----------|
|                                                           | $\Delta E$     | $T_{1/2}$ |
| $\text{R}_2 = \text{OH}$                                  | 0.25           | -38       |
| $\text{R}_2 = \text{OMe}$                                 | -5.07          | -307      |
| $\text{R}_2 = \text{Me}$                                  | 1.20           | -2        |
| $\text{R}_2 = \text{H}$                                   | 1.73           | 24        |
| $\text{R}_2 = \text{Cl}$                                  | 1.33           | 3         |
| $\text{R}_2 = \text{Br}$                                  | 1.48           | 9         |
| $\text{R}_2 = \text{CF}_3$                                | 2.64           | 62        |

**S6.** A data set collection of computational results is available in the ioChem-BD repository<sup>[1]</sup> and can be accessed via <https://doi.org/10.19061/iochem-bd-6-152>

[1] Álvarez-Moreno, M.; de Graaf, C.; Lopez, N.; Maseras, F.; Poblet, J.M.; Bo, C. J. Chem. Inf. Model. 2015, 55, 95,103.

## S7. Counterion effect control calculations

The effect of adding counterions to the studied systems was calibrated doing two sets of control calculations.

First, we studied if adding different counterions had a significant impact on the spin-state energy gaps. This was done by computing the  $[\text{Fe}(\text{CH}_3\text{-L}_1\text{-pH})(\text{NCS})_3][\text{C}]^-$  where C could be  $[\text{NMe}_4]^+$ ,  $[\text{NEt}_4]^+$  or  $[\text{PPh}_4]^+$ . Results are summarized below:

| System                                                          | Refcode | Counterion         | $\Delta E$ | $\Delta E(\text{BSSE})$ | $\Delta H$ | $\Delta S$ | $T_{1/2}$ |
|-----------------------------------------------------------------|---------|--------------------|------------|-------------------------|------------|------------|-----------|
| $[\text{Fe}(\text{CH}_3\text{-L}_1\text{-pH})(\text{NCS})_3]^-$ |         | -                  | 10.48      | 10.48                   | 9.15       | 23.50      | 389       |
| $[\text{Fe}(\text{CH}_3\text{-L}_1\text{-pH})(\text{NCS})_3]^-$ | IHEKEN  | $[\text{NBu}_4]^+$ | 12.55      | 11.71                   | 11.29      | 21.075     | 536       |
| $[\text{Fe}(\text{CH}_3\text{-L}_1\text{-pH})(\text{NCS})_3]^-$ | UXOHEW  | $[\text{PPh}_4]^+$ | 12.37      | 11.46                   | 11.04      | 24.136     | 458       |
| $[\text{Fe}(\text{CH}_3\text{-L}_1\text{-pH})(\text{NCS})_3]^-$ | VULHES  | $[\text{NMe}_4]^+$ | 12.83      | 12.63                   | 11.49      | 21.361     | 538       |

Computed spin-state energy gap ( $\Delta E$ ), enthalpy ( $\Delta H$ ), entropy ( $\Delta S$ ) and estimated  $T_{1/2}$  for the  $[\text{Fe}(\text{CH}_3\text{-L}_1\text{-pH})(\text{NCS})_3]^-$  molecule, without and with different counterions. Energy and enthalpy in kcal/mol, entropy in cal·K<sup>-1</sup>·mol<sup>-1</sup>, and temperatures in K

As can be seen, once the spin-state energy gap is corrected for the basis set superposition error (BSSE), the spin-state energy gap changes very little, and the computed values are also quite close to the spin-state energy gap without counterion. Remarkably, the calculations can model the decrease in  $T_{1/2}$  when the counterion is  $[\text{PPh}_4]^+$ , as observed experimentally (see table S2).

The second test was done by computing the whole series of  $[\text{Fe}(\text{CH}_3\text{-L}_1\text{-pH})(\text{NCE})_3]^-$  (E = O, S, Se or BH<sub>3</sub>) with and without counterions, and comparing this results with the ones computed for the  $[\text{Fe}(\text{OEt-L}_1\text{-pH})(\text{NCE})_3]^-$  system. Results are provide in the table below.

| NCE                            | f    | $[\text{Fe}(\text{CH}_3\text{-L}_1\text{-pH})(\text{NCE})_3][\text{NMe}_4]$ | $[\text{Fe}(\text{CH}_3\text{-L}_1\text{-pH})(\text{NCE})_3]^-$ | $[\text{Fe}(\text{OEt-L}_1\text{-pH})(\text{NCE})_3]^-$ |
|--------------------------------|------|-----------------------------------------------------------------------------|-----------------------------------------------------------------|---------------------------------------------------------|
| NCS <sup>-</sup>               | 1.2  | 538                                                                         | 389                                                             | 226                                                     |
| NCS <sup>e-</sup>              | 1.23 | 588                                                                         | 445                                                             | 281                                                     |
| NCBH <sub>3</sub> <sup>-</sup> | 1.29 | 723                                                                         | 612                                                             | 441                                                     |
| NCO <sup>-</sup>               | 1.09 | 293                                                                         | 240                                                             | 24                                                      |

f factors and computed transition temperatures for the  $[\text{Fe}(\text{CH}_3\text{-L}_1\text{-pH})(\text{NCE})_3][\text{NMe}_4]$ ,  $[\text{Fe}(\text{CH}_3\text{-L}_1\text{-pH})(\text{NCE})_3]^-$  and  $[\text{Fe}(\text{OEt-L}_1\text{-pH})(\text{NCE})_3]^-$  (E = S, Se, O, BH<sub>3</sub>) systems.



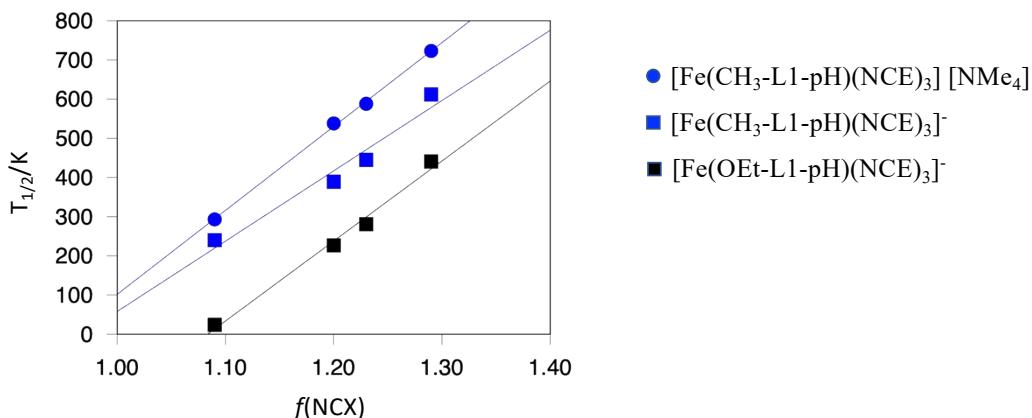

Correlation between the computed  $T_{1/2}$  and the  $f$  factor for the  $[\text{Fe}(\text{CH}_3\text{-L}_1\text{-pH})(\text{NCE})_3][\text{NMe}_4]$  (blue circle),  $[\text{Fe}(\text{CH}_3\text{-L}_1\text{-pH})(\text{NCE})_3]^-$  (blue square) and  $[\text{Fe}(\text{OEt-L}_1\text{-pH})(\text{NCE})_3]^-$  (black square) ( $\text{E} = \text{O}, \text{S}, \text{Se}$  and  $\text{BH}_3$ ).

As can be seen in the above figure, the effect of adding counterions does not alter the trends, and is inferior to the one produced by changing  $\text{R}_1 = -\text{CH}_3$  to  $\text{R}_1 = -\text{OEt}$ .

From this results, one can see firstly that the reported trends do not change upon inclusion of the counterion. Secondly, the main driving effect is replacing the  $\text{R}_2$  group from  $-\text{OEt}$  to  $-\text{CH}_3$ , thus proving one more time that the electronically driven effects are properly captured by the reported methodology.
